# Supplementary material for: Kinetic Assessment and Therapeutic Modulation of Metabolic and Inflammatory Profiles in Mice on a High-Fat and Cholesterol Diet
Source: Hindawi journal article supplement (doi:10.1155/2010/970164), 2010-01-01
Supplement: f1 [file 970164.f1.pdf]

Supplemental Table 1. Primer sequences

| Gene         | Refseq ID | Forward Primer               | Reverse Primer              | Probe (UPL) | Probe    | Control (PCR fragment) |
|--------------|-----------|------------------------------|-----------------------------|-------------|----------|------------------------|
| IL-1 $\beta$ | NM_008361 | 142/tgacggaccctcaaaagat      | 216/gaagctggatgctctcatctg   | # 26        | ctgggctg | 98-598 (501 bp)        |
| IL-6         | NM_031168 | 327/gctaccaactggatataatcagga | 404/ccaggtagctatggactccagaa | # 6         | ttctctg  | 65-542 (478 bp)        |
| TNF $\alpha$ | NM_013693 | 428/ctgtagcccacgtcgtagc      | 524/ttgatccatgccgttg        | # 25        | tggaggag | 281-699 (419 bp)       |
| IL-10        | NM_010548 | 184/cagagccacatgctcctaga     | 262/tgtccagctgtcctttgtt     | # 41        | cttcagcc | 92-497 (406 bp)        |
| CCL2         | NM_011333 | 142/catccacgtgttgctca        | 217/gatcatctgctggatgagt     | # 62        | acctgctg | 36-451 (416 bp)        |
| TGF $\beta$  | NM_011577 | 1358/tggagcaacatgtggaactc    | 1428/cagcagccggttaccag      | # 72        | ttctgctg | 1054-1599 (546 bp)     |
| CD11c        | NM_021334 | 1725/atggagcctcaagacaggac    | 1787/ggatctgggatgctgaaatc   | # 20        | ccagccag | 1554-2145 (592 bp)     |
| LYVE-1       | NM_053247 | 758/gaagcagctgggtttgga       | 847/gtagcaaacagccagcacag    | # 91        | ctctctc  | 623-1092 (470 bp)      |
| ApoE.        | NM_009696 | 370/cccaagtacacaagaactgac    | 465/ccactggaccagctgtt       | # 17        | aggagctg | 186-617 (432 bp)       |
